# Supplementary material for: Rotator cuff repair: what questions are patients asking online and where are they getting their answers?
Source: PubMed Central journal article supplement — Clin Shoulder Elb. 2023 Feb 23;26(1):25–31. doi: 10.5397/cise.2022.01235 (PMC10030981; doi:10.5397/cise.2022.01235), 2023-02-23
Supplement: cise-2022-01235-Supplementary-Table-1.pdf [file cise-2022-01235-Supplementary-Table-1.pdf]

**Supplementary Table 1.** Description and examples of each type of website classification

| Website categorization   |                                                                                                                                                                                                                           |
|--------------------------|---------------------------------------------------------------------------------------------------------------------------------------------------------------------------------------------------------------------------|
| Academic                 | Webpage hosted by an academic institution or organization<br>e.g., <a href="https://hopkinsmedicine.org">https://hopkinsmedicine.org</a> , <a href="https://orthoinfo.aaos.org">https://orthoinfo.aaos.org</a>            |
| Commercial               | Webpage hosted by a for-profit company<br>e.g., <a href="https://foothillstherapy.com">https://foothillstherapy.com</a> , <a href="https://optivusphysicaltherapy.com">https://optivusphysicaltherapy.com</a>             |
| Journal                  | Academic journal publication, may be hosted by third party site<br>e.g., <a href="https://pubmed.com">https://pubmed.com</a> , <a href="https://sciencedirect.com">https://sciencedirect.com</a>                          |
| Government               | Governmental hosted webpage<br>e.g., <a href="https://myhealth.alberta.ca">https://myhealth.alberta.ca</a> , <a href="https://medlineplus.gov">https://medlineplus.gov</a>                                                |
| Legal                    | Single attorney, law firm, or legal advice webpage<br>e.g., <a href="https://rosenfeldinjurylawyers.com">https://rosenfeldinjurylawyers.com</a> , <a href="https://rossfeller-casey.com">https://rossfeller-casey.com</a> |
| Medical information site | Company or organization for the purpose of medical information reviewed by medical professionals<br>e.g., <a href="https://webmd.com">https://webmd.com</a> , <a href="https://healthline.com">https://healthline.com</a> |
| Medical practice         | Medical or surgical practice of physicians<br>e.g., <a href="https://austinshouldersurgery.com">https://austinshouldersurgery.com</a> , <a href="https://orthobethesda.com">https://orthobethesda.com</a>                 |
| Non-medical media site   | Webpages not specializing in medical information such as general news and social media sites<br>e.g., <a href="https://wikipedia.com">https://wikipedia.com</a> , <a href="https://abcnews.com">https://abcnews.com</a>   |
| Single surgeon practice  | Single surgeon practice or personal webpage<br>e.g., <a href="https://gomeramd.com">https://gomeramd.com</a> , <a href="https://hyderabadshoulderclinic.com">https://hyderabadshoulderclinic.com</a>                      |
